# Supplementary material for: Evidence that Adaptation in Drosophila Is Not Limited by Mutation at Single Sites
Source: PubMed Central journal article supplement (PMC2887467; doi:10.1371/journal.pgen.1000924), 2010-06-17
Supplement: pgen.1000924.s001.pdf [file pgen.1000924.s001.pdf]

**Figure S1. Structure of the *Ace* gene.**

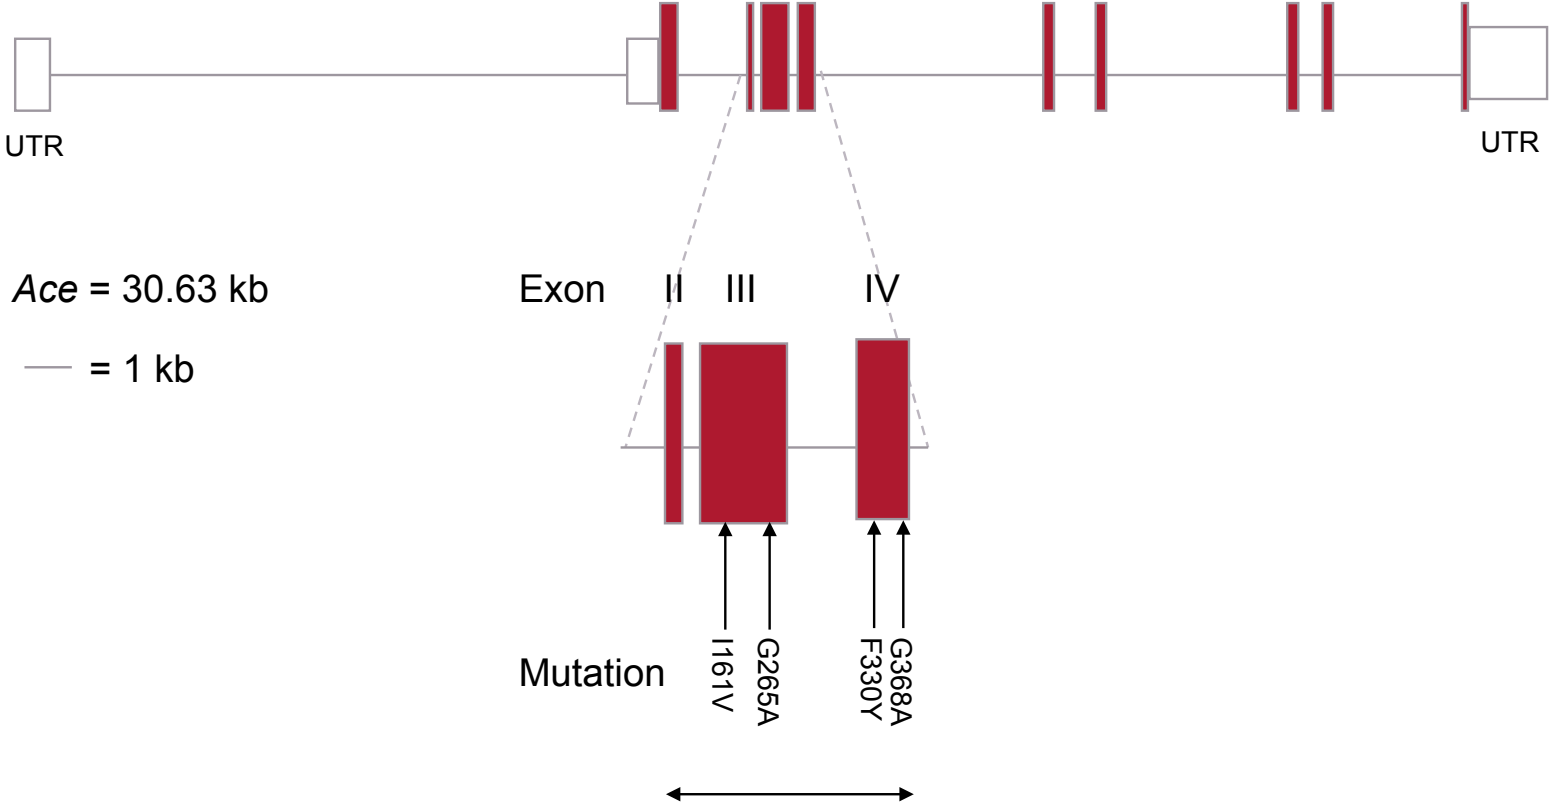

Sequenced 1.5 kb of *Ace* encompassing exons II-IV
