# Supplementary material for: Evidence that Adaptation in Drosophila Is Not Limited by Mutation at Single Sites
Source: PubMed Central journal article supplement (PMC2887467; doi:10.1371/journal.pgen.1000924), 2010-06-17
Supplement: pgen.1000924.s002.pdf [file pgen.1000924.s002.pdf]

| <b>Table S1. Description of <i>D. melanogaster</i> strains.</b> |                                   |                  |
|-----------------------------------------------------------------|-----------------------------------|------------------|
| Name of population                                              | Geographical origin               | Reference        |
| Wi                                                              | Wolfskill Orchard, Davis, CA, USA | Sergey Nuzhdin   |
| We1                                                             | Raleigh, NC, USA                  | Greg Gibson      |
| We2                                                             | Raleigh, NC, USA                  | Greg Gibson      |
| Bak                                                             | Bakersfield, CA, USA              | Dmitri Petrov    |
| Med                                                             | Medford, OR, USA                  | Dmitri Petrov    |
| SD                                                              | San Diego, CA, USA                | Peter Andolfatto |
| WMG                                                             | Fort Pierce, FL, USA              | Paul Schmidt     |
| RR06                                                            | Bowdoinham, ME, USA               | Paul Schmidt     |
| Por                                                             | Portland, OR, USA                 | Dmitri Petrov    |
| ZH                                                              | Zimbabwe                          | Peter Andolfatto |
| ZS                                                              | Zimbabwe                          | Peter Andolfatto |
| ZW                                                              | Zimbabwe                          | Peter Andolfatto |
| Ky                                                              | Kenya                             | Peter Andolfatto |
| N                                                               | Queensland, Australia             | Ary Hoffmann     |
| S                                                               | Victoria, Australia               | Ary Hoffmann     |
| MAE                                                             | Redland Bay, Queensland, AUS      | Ary Hoffmann     |
| M                                                               | Melbourne, Victoria, AUS          | Ary Hoffmann     |
| Amherst-3                                                       | -                                 | M strain         |
| Berlin-K                                                        | -                                 | M strain         |
| Canton-S                                                        | -                                 | M strain         |
| Csiso-3                                                         | -                                 | M strain         |
| Lausanne-S                                                      | -                                 | M strain         |
| Oregon R-C                                                      | -                                 | M strain         |
| Oregon-R-S                                                      | -                                 | M strain         |
| Oriso-2                                                         | -                                 | M strain         |
| Samarkand                                                       | -                                 | M strain         |
| Swedish-C                                                       | -                                 | M strain         |
