# Supplementary material for: Evidence that Adaptation in Drosophila Is Not Limited by Mutation at Single Sites
Source: PubMed Central journal article supplement (PMC2887467; doi:10.1371/journal.pgen.1000924), 2010-06-17
Supplement: pgen.1000924.s004.pdf [file pgen.1000924.s004.pdf]

**Table S3. Dynamics of resistance adaptation for different population parameters**

| $n$ | $\Theta$ | $M$  | $\rho$ | $\Theta_\Sigma$ | $\Theta_\pi$ | $s_{1m} = .025, s_{2m} = .05, s_{3m} = .1$ |          |          |       | $s_{1m} = .05, s_{2m} = .1, s_{3m} = .2$ |          |          |       | $s_{1m} = .25, s_{2m} = .5, s_{3m} = 1$ |          |          |       | $s_{1m} = 1, s_{2m} = 2, s_{3m} = 5$ |          |          |       |
|-----|----------|------|--------|-----------------|--------------|--------------------------------------------|----------|----------|-------|------------------------------------------|----------|----------|-------|-----------------------------------------|----------|----------|-------|--------------------------------------|----------|----------|-------|
|     |          |      |        |                 |              | $P_{1m}$                                   | $P_{3m}$ | $P_{ss}$ | $P_c$ | $P_{1m}$                                 | $P_{3m}$ | $P_{ss}$ | $P_c$ | $P_{1m}$                                | $P_{3m}$ | $P_{ss}$ | $P_c$ | $P_{1m}$                             | $P_{3m}$ | $P_{ss}$ | $P_c$ |
| 1   | 0.01     | -    | 0.00   | 0.01            | 0.010        | 0.242                                      | 0.000    | 0.002    | 0.000 | 0.455                                    | 0.003    | 0.005    | 0.000 | 0.932                                   | 0.184    | 0.008    | 0.002 | 0.997                                | 0.552    | 0.006    | 0.003 |
| 1   | 0.01     | -    | 0.15   | 0.01            | 0.010        | 0.238                                      | 0.000    | 0.004    | 0.000 | 0.455                                    | 0.005    | 0.006    | 0.000 | 0.932                                   | 0.200    | 0.008    | 0.002 | 0.997                                | 0.563    | 0.006    | 0.003 |
| 1   | 0.01     | -    | 1.00   | 0.01            | 0.010        | 0.239                                      | 0.000    | 0.008    | 0.000 | 0.456                                    | 0.006    | 0.010    | 0.000 | 0.932                                   | 0.204    | 0.010    | 0.002 | 0.997                                | 0.564    | 0.006    | 0.003 |
| 1   | 0.01     | -    | 10.00  | 0.01            | 0.010        | 0.238                                      | 0.001    | 0.206    | 0.000 | 0.456                                    | 0.008    | 0.211    | 0.003 | 0.931                                   | 0.209    | 0.040    | 0.008 | 0.998                                | 0.568    | 0.014    | 0.008 |
| 2   | 0.01     | 0.01 | 0.15   | 0.02            | 0.145        | 0.411                                      | 0.000    | 0.020    | 0.000 | 0.698                                    | 0.015    | 0.054    | 0.001 | 0.995                                   | 0.517    | 0.100    | 0.050 | 1.000                                | 0.901    | 0.091    | 0.081 |
| 2   | 0.01     | 1    | 0.15   | 0.02            | 0.021        | 0.413                                      | 0.001    | 0.018    | 0.000 | 0.701                                    | 0.024    | 0.032    | 0.001 | 0.995                                   | 0.567    | 0.043    | 0.024 | 1.000                                | 0.914    | 0.033    | 0.030 |
| 2   | 0.01     | 10   | 0.15   | 0.02            | 0.020        | 0.412                                      | 0.001    | 0.015    | 0.000 | 0.700                                    | 0.027    | 0.027    | 0.001 | 0.995                                   | 0.572    | 0.037    | 0.020 | 1.000                                | 0.917    | 0.027    | 0.024 |
| 10  | 0.01     | 0.01 | 0.15   | 0.10            | 0.325        | 0.853                                      | 0.001    | 0.123    | 0.000 | 0.994                                    | 0.202    | 0.437    | 0.072 | 1.000                                   | 1.000    | 0.465    | 0.464 | 1.000                                | 1.000    | 0.432    | 0.432 |
| 10  | 0.01     | 1    | 0.15   | 0.10            | 0.102        | 0.894                                      | 0.007    | 0.188    | 0.001 | 0.996                                    | 0.531    | 0.241    | 0.125 | 1.000                                   | 1.000    | 0.241    | 0.241 | 1.000                                | 1.000    | 0.193    | 0.193 |
| 10  | 0.01     | 10   | 0.15   | 0.10            | 0.100        | 0.909                                      | 0.021    | 0.158    | 0.003 | 0.996                                    | 0.567    | 0.181    | 0.104 | 1.000                                   | 1.000    | 0.185    | 0.185 | 1.000                                | 1.000    | 0.146    | 0.146 |
| 100 | 0.01     | 0.01 | 0.15   | 1.00            | 1.281        | 1.000                                      | 0.014    | 0.817    | 0.007 | 1.000                                    | 1.000    | 0.843    | 0.843 | 1.000                                   | 1.000    | 0.889    | 0.889 | 1.000                                | 1.000    | 0.875    | 0.875 |
| 100 | 0.01     | 1    | 0.15   | 1.00            | 1.014        | 1.000                                      | 0.696    | 0.631    | 0.414 | 1.000                                    | 1.000    | 0.638    | 0.638 | 1.000                                   | 1.000    | 0.622    | 0.622 | 1.000                                | 1.000    | 0.520    | 0.520 |
| 100 | 0.01     | 10   | 0.15   | 1.00            | 0.924        | 1.000                                      | 0.918    | 0.565    | 0.511 | 1.000                                    | 1.000    | 0.575    | 0.575 | 1.000                                   | 1.000    | 0.577    | 0.577 | 1.000                                | 1.000    | 0.462    | 0.462 |
| 1   | 0.1      | -    | 0.00   | 0.10            | 0.100        | 0.920                                      | 0.001    | 0.080    | 0.001 | 0.998                                    | 0.462    | 0.090    | 0.043 | 1.000                                   | 1.000    | 0.079    | 0.079 | 1.000                                | 1.000    | 0.054    | 0.054 |
| 1   | 0.1      | -    | 0.15   | 0.10            | 0.100        | 0.918                                      | 0.056    | 0.085    | 0.005 | 0.997                                    | 0.628    | 0.087    | 0.054 | 1.000                                   | 1.000    | 0.077    | 0.077 | 1.000                                | 1.000    | 0.052    | 0.052 |
| 1   | 0.1      | -    | 1.00   | 0.10            | 0.100        | 0.915                                      | 0.097    | 0.105    | 0.011 | 0.998                                    | 0.666    | 0.093    | 0.059 | 1.000                                   | 1.000    | 0.074    | 0.074 | 1.000                                | 1.000    | 0.057    | 0.057 |
| 2   | 0.1      | 0.01 | 0.15   | 0.20            | 1.450        | 0.992                                      | 0.101    | 0.323    | 0.036 | 1.000                                    | 0.874    | 0.349    | 0.305 | 1.000                                   | 1.000    | 0.355    | 0.355 | 1.000                                | 1.000    | 0.333    | 0.333 |
| 2   | 0.1      | 1    | 0.15   | 0.20            | 0.213        | 0.993                                      | 0.111    | 0.305    | 0.035 | 1.000                                    | 0.921    | 0.319    | 0.293 | 1.000                                   | 1.000    | 0.311    | 0.311 | 1.000                                | 1.000    | 0.259    | 0.259 |
| 2   | 0.1      | 10   | 0.15   | 0.20            | 0.201        | 0.992                                      | 0.134    | 0.287    | 0.036 | 1.000                                    | 0.936    | 0.291    | 0.272 | 1.000                                   | 1.000    | 0.291    | 0.291 | 1.000                                | 1.000    | 0.232    | 0.232 |
| 10  | 0.1      | 0.01 | 0.15   | 1.00            | 3.255        | 1.000                                      | 0.220    | 0.663    | 0.128 | 1.000                                    | 1.000    | 0.700    | 0.700 | 1.000                                   | 1.000    | 0.801    | 0.801 | 1.000                                | 1.000    | 0.859    | 0.859 |
| 10  | 0.1      | 1    | 0.15   | 1.00            | 1.024        | 1.000                                      | 0.497    | 0.792    | 0.370 | 1.000                                    | 1.000    | 0.817    | 0.817 | 1.000                                   | 1.000    | 0.845    | 0.845 | 1.000                                | 1.000    | 0.811    | 0.811 |
| 10  | 0.1      | 10   | 0.15   | 1.00            | 0.985        | 1.000                                      | 0.787    | 0.789    | 0.603 | 1.000                                    | 1.000    | 0.793    | 0.793 | 1.000                                   | 1.000    | 0.823    | 0.823 | 1.000                                | 1.000    | 0.765    | 0.765 |
| 1   | 1        | -    | 0.00   | 1.00            | 1.000        | 1.000                                      | 0.230    | 0.515    | 0.116 | 1.000                                    | 1.000    | 0.506    | 0.506 | 1.000                                   | 1.000    | 0.474    | 0.474 | 1.000                                | 1.000    | 0.373    | 0.373 |
| 1   | 1        | -    | 0.15   | 1.00            | 1.000        | 1.000                                      | 0.964    | 0.504    | 0.482 | 1.000                                    | 1.000    | 0.502    | 0.502 | 1.000                                   | 1.000    | 0.475    | 0.475 | 1.000                                | 1.000    | 0.382    | 0.382 |
| 2   | 1        | 1    | 0.15   | 2.00            | 2.125        | 1.000                                      | 0.999    | 0.752    | 0.751 | 1.000                                    | 1.000    | 0.755    | 0.755 | 1.000                                   | 1.000    | 0.737    | 0.737 | 1.000                                | 1.000    | 0.677    | 0.677 |
| 2   | 1        | 10   | 0.15   | 2.00            | 2.012        | 1.000                                      | 0.999    | 0.757    | 0.756 | 1.000                                    | 1.000    | 0.755    | 0.755 | 1.000                                   | 1.000    | 0.744    | 0.744 | 1.000                                | 1.000    | 0.681    | 0.681 |

Population structure is specified by the number  $n$  of subpopulations,  $\Theta$  within subpopulations, the average number  $M$  of individuals that migrate between each pair of subpopulations per generation, and the recombination rate  $\rho$  in cM/Mbp. Values of the expected average heterozygosity  $\Theta_\pi$  for the entire population were obtained from coalescent simulations with  $ms$ . Summary statistics are averages over at least 100000 runs for each scenario.
