# Supplementary material for: Evidence that Adaptation in Drosophila Is Not Limited by Mutation at Single Sites
Source: PubMed Central journal article supplement (PMC2887467; doi:10.1371/journal.pgen.1000924), 2010-06-17
Supplement: pgen.1000924.s005.pdf [file pgen.1000924.s005.pdf]

**Table S4. Change of mutation configuration.**

**A Mutation:**

| site \ <i>h</i> | 000 | 001 | 010 | 100 | 011 | 101 | 110 | 111 |
|-----------------|-----|-----|-----|-----|-----|-----|-----|-----|
| 1               | 100 | 101 | 110 | 000 | 111 | 001 | 010 | 011 |
| 2               | 010 | 011 | 000 | 110 | 001 | 111 | 100 | 101 |
| 3               | 001 | 000 | 011 | 101 | 010 | 100 | 111 | 110 |

**B Recombination:**

| <i>h1</i> \ <i>h2</i> | 000 | 001                    | 010                    | 100                    | 011                    | 101                    | 110                    | 111                    |
|-----------------------|-----|------------------------|------------------------|------------------------|------------------------|------------------------|------------------------|------------------------|
| 000                   |     | 001 / 000<br>001 / 000 | 010 / 000<br>000 / 010 | 000 / 100<br>000 / 100 | 011 / 000<br>001 / 010 | 001 / 100<br>001 / 100 | 010 / 100<br>000 / 110 | 011 / 100<br>001 / 110 |
| 001                   |     |                        | 010 / 001<br>000 / 011 | 000 / 101<br>000 / 101 | 011 / 001<br>001 / 011 | 001 / 101<br>001 / 101 | 010 / 101<br>000 / 111 | 011 / 101<br>001 / 111 |
| 010                   |     |                        |                        | 000 / 110<br>010 / 100 | 011 / 010<br>011 / 010 | 001 / 110<br>011 / 100 | 010 / 110<br>010 / 110 | 011 / 110<br>011 / 110 |
| 100                   |     |                        |                        |                        | 111 / 000<br>101 / 010 | 101 / 100<br>101 / 100 | 110 / 100<br>100 / 110 | 111 / 100<br>101 / 110 |
| 011                   |     |                        |                        |                        |                        | 001 / 111<br>011 / 101 | 010 / 111<br>010 / 111 | 011 / 111<br>011 / 111 |
| 101                   |     |                        |                        |                        |                        |                        | 110 / 101<br>100 / 111 | 111 / 101<br>101 / 111 |
| 110                   |     |                        |                        |                        |                        |                        |                        | 111 / 110<br>111 / 110 |

(A) Mutation configuration outcomes for all possible initial configurations *h* of the mutating haplotype (columns) if a mutation occurs at one of the three adaptive sites (rows). White cells denote mutation events that decrease resistance. Gray cells are events that potentially increase resistance. (B) Mutation configuration outcomes for all possible combinations of two recombining haplotypes *h1*, *h2*. The upper line of each cell specifies the mutation configurations of the two resulting haplotypes if the recombination breakpoint lies between sites one and two, lower lines specify the outcome for recombination breakpoints between sites two and three. Notice that recombinations between haplotypes with equal mutation configuration, and events where the recombination breakpoint does not lie between sites one and three, cannot give rise to new configurations. Grey-shaded outcomes represent events where a haplotype with higher resistance than each of the two original haplotypes is generated. The matrix is symmetrical.
