# Supplementary material for: Evidence that Adaptation in Drosophila Is Not Limited by Mutation at Single Sites
Source: PLoS Genet. 2010 Jun 17;6(6):e1000924. doi: 10.1371/journal.pgen.1000924 (PMC2887467; doi:10.1371/journal.pgen.1000924)
Supplement: Table S2 — Segregating sites at the Ace locus in all strains sequenced. (0.07 MB PDF) [file pgen.1000924.s003.pdf]

**Table S2. Segregating sites at the *Ace* locus in all strains sequenced.**

[illegible]
